# Supplementary material
Source: PubMed Central journal article supplement (PMC4349251)
Supplement: cr201522x1.pdf [file cr201522x1.pdf]

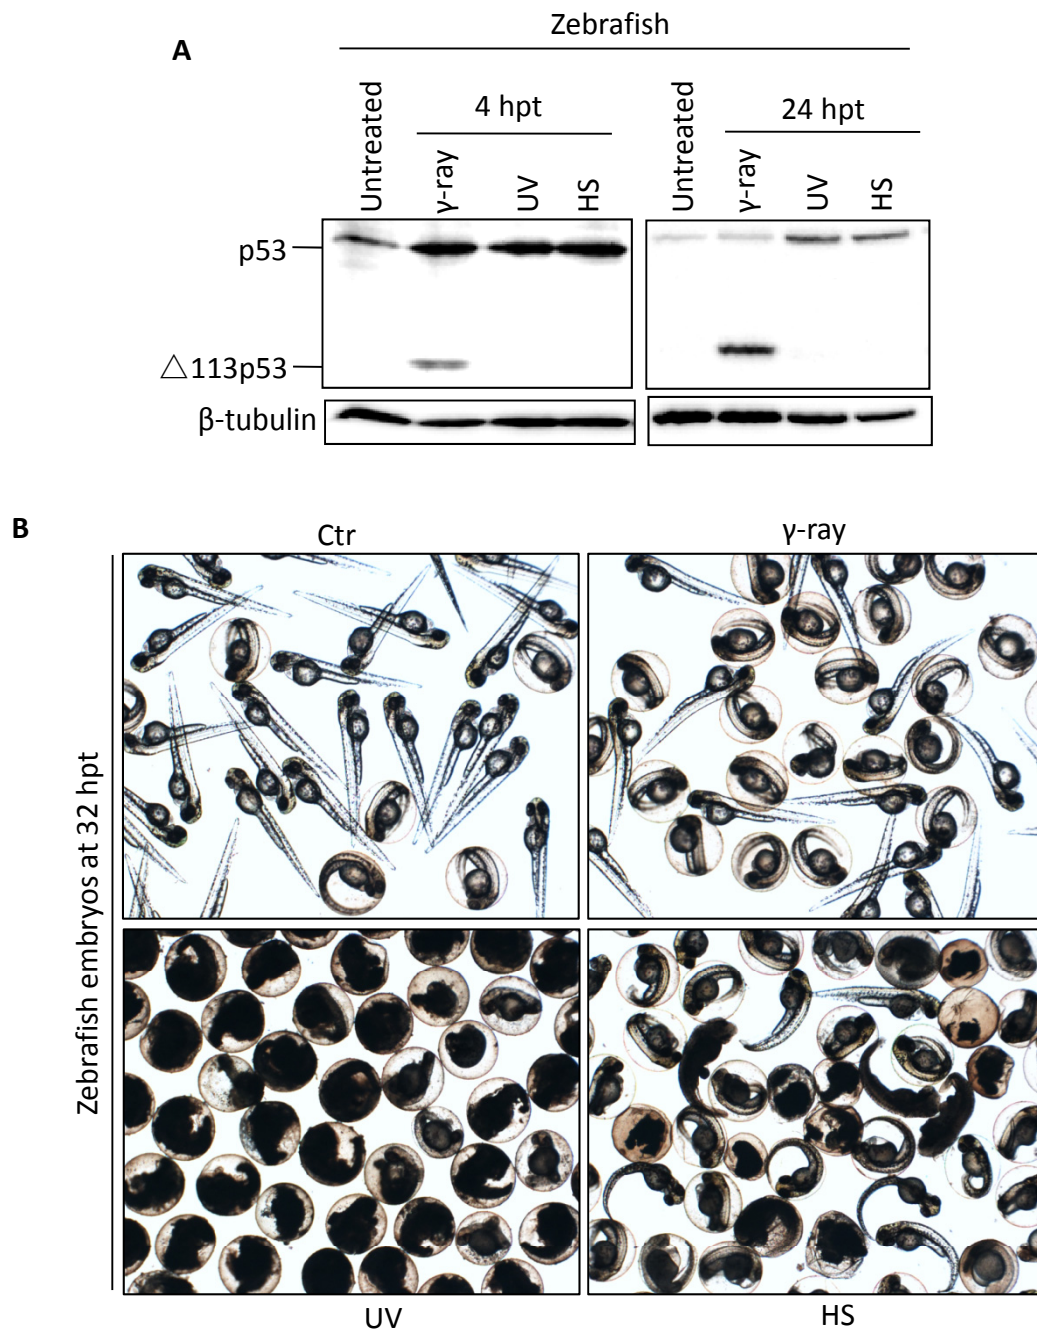

**Supplementary information, Figure S1** (A) Western blot of zebrafish p53 and  $\Delta 113$ p53 proteins in an untreated control (ctr) and in embryos treated with  $\gamma$ -ray, UV irradiation (UV) and heat shock (HS) at 4 and 24 h post treatment (hpt), using A7-C10 zebrafish p53 monoclonal antibody.  $\beta$ -tubulin was used as the protein loading control. (B) WT embryos at 1 dpf were treated with  $\gamma$ -ray, UV irradiation and heat shock HS. The pictures were taken at 32 hpt.
