# Supplementary material
Source: PubMed Central journal article supplement (PMC4349251)
Supplement: cr201522x3.pdf [file cr201522x3.pdf]

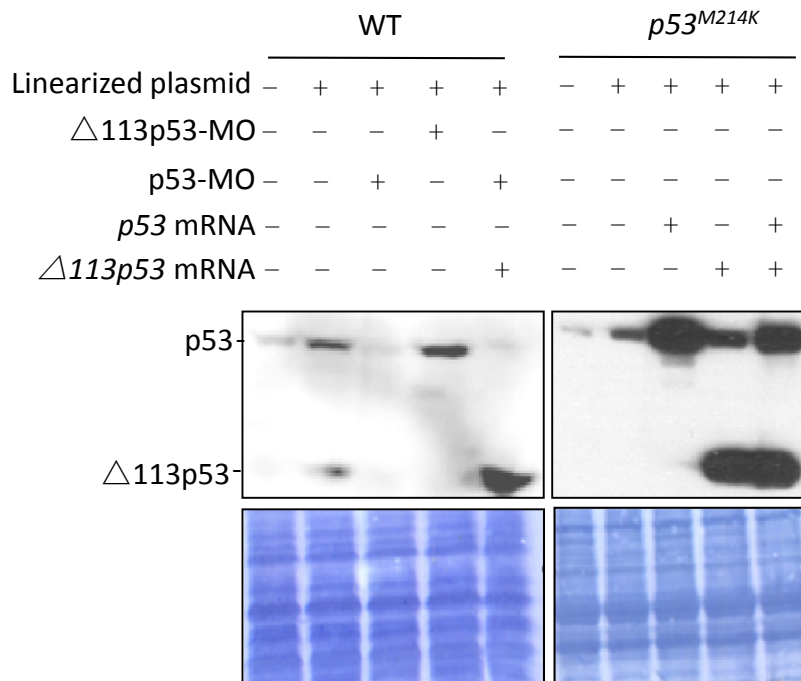

**Supplementary information, Figure S3** Knockdown of p53 and Δ113p53 proteins by p53-MO and Δ113p53-MO, or the overexpression of p53 and Δ113p53 by *p53* and Δ113*p53* mRNA injection in embryos injected with linearized plasmid DNA. Linearized plasmid DNA was co-injected with different morpholinos and/or mRNA into WT and *p53*<sup>M214K</sup> mutant embryos as indicated. Proteins were extracted 8 h post fertilization (hpf).
