# Supplementary material
Source: PubMed Central journal article supplement (PMC4349251)
Supplement: cr201522x4.pdf [file cr201522x4.pdf]

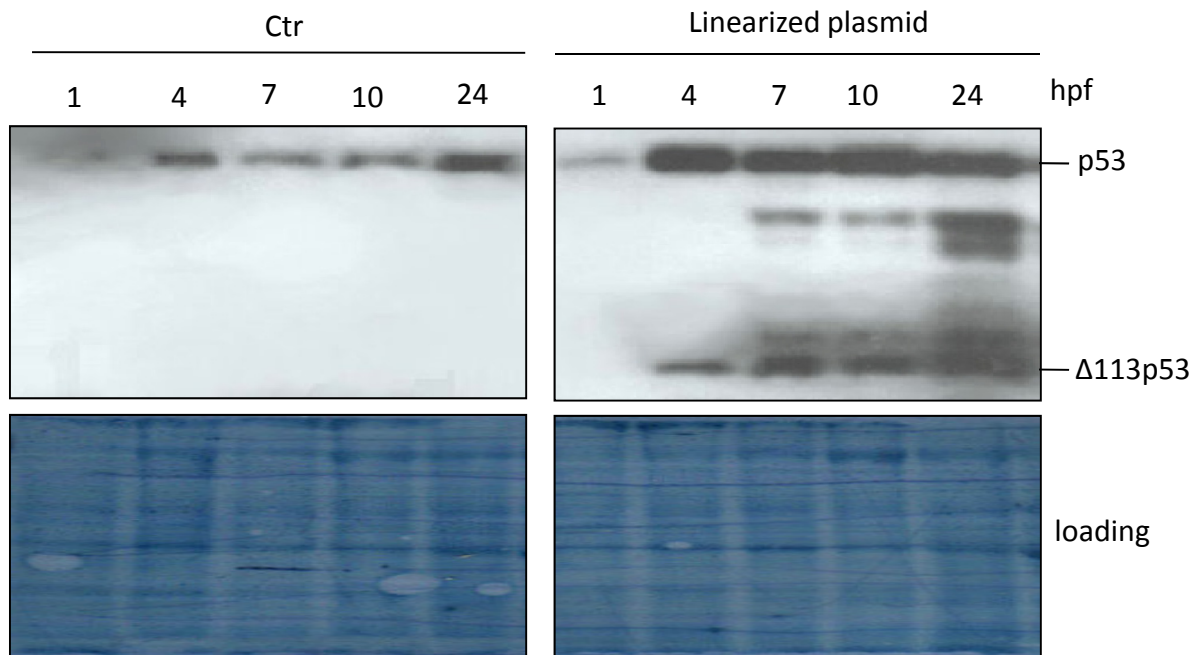

**Supplementary information, Figure S4** The activation of p53 and induction of  $\Delta 113$ p53 proteins in zebrafish WT embryos injected with a linearized plasmid. A zebrafish embryo was injected with phenolred (injection control) or injected with 50 pg linearized pEGFP plasmid. The total protein was extracted at 1, 4, 7, 10 and 24 hpf and was subjected to Western blot analysis with the A7-C10 zebrafish p53 monoclonal antibody. Total protein stained with Coomassie blue was used as the loading control.
