# Supplementary material
Source: PubMed Central journal article supplement (PMC4349251)
Supplement: cr201522x5.pdf [file cr201522x5.pdf]

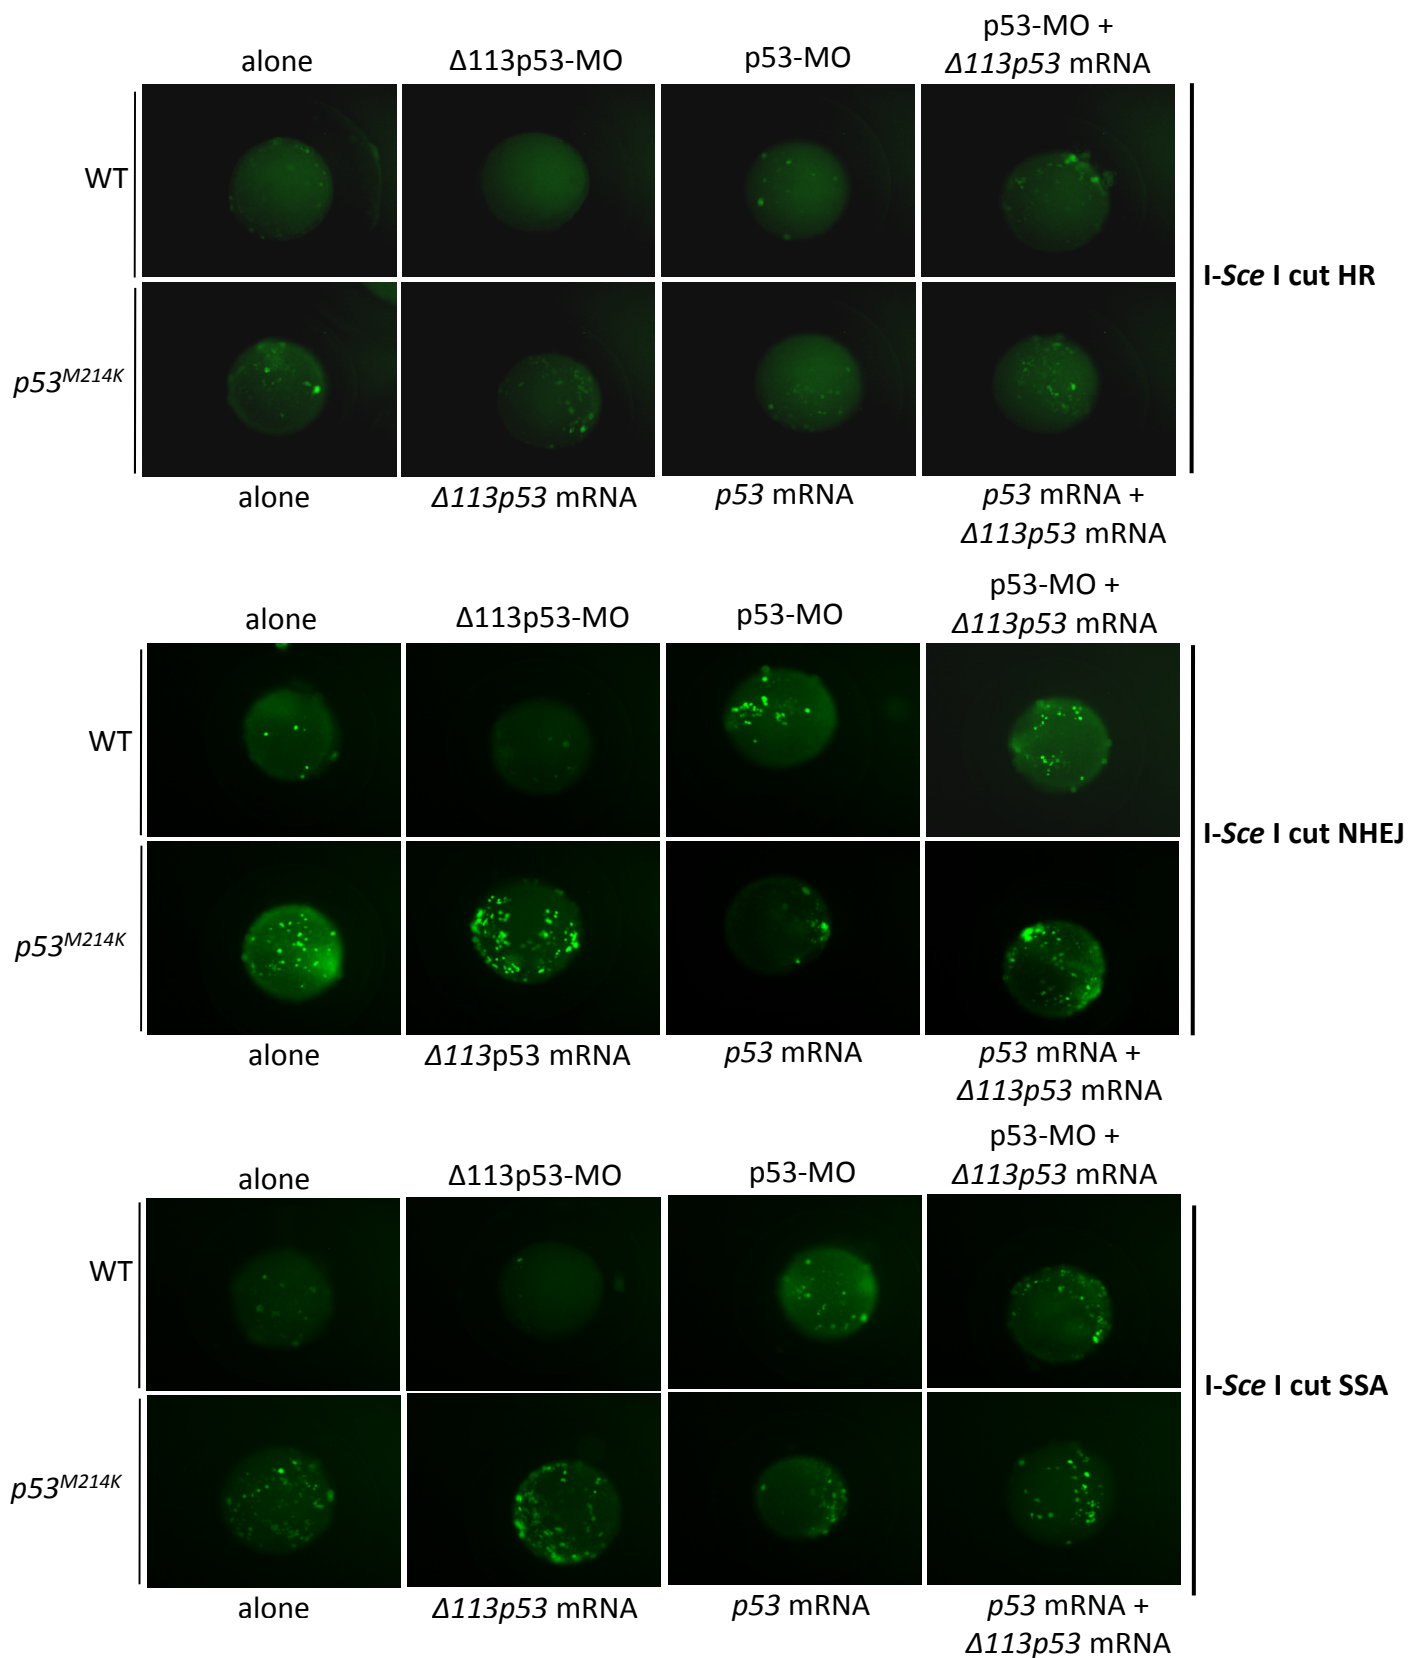

**Supplementary information, Figure S5** Fluorescence imaging of HR, SSA and NHEJ repairs from zebrafish embryos injected with different reagents as indicated at 10 hpf. The experiments were performed as described in Figure 1C. Fluorescence images were taken just before DNA extraction.
