# Supplementary material
Source: PubMed Central journal article supplement (PMC4349251)
Supplement: cr201522x6.pdf [file cr201522x6.pdf]

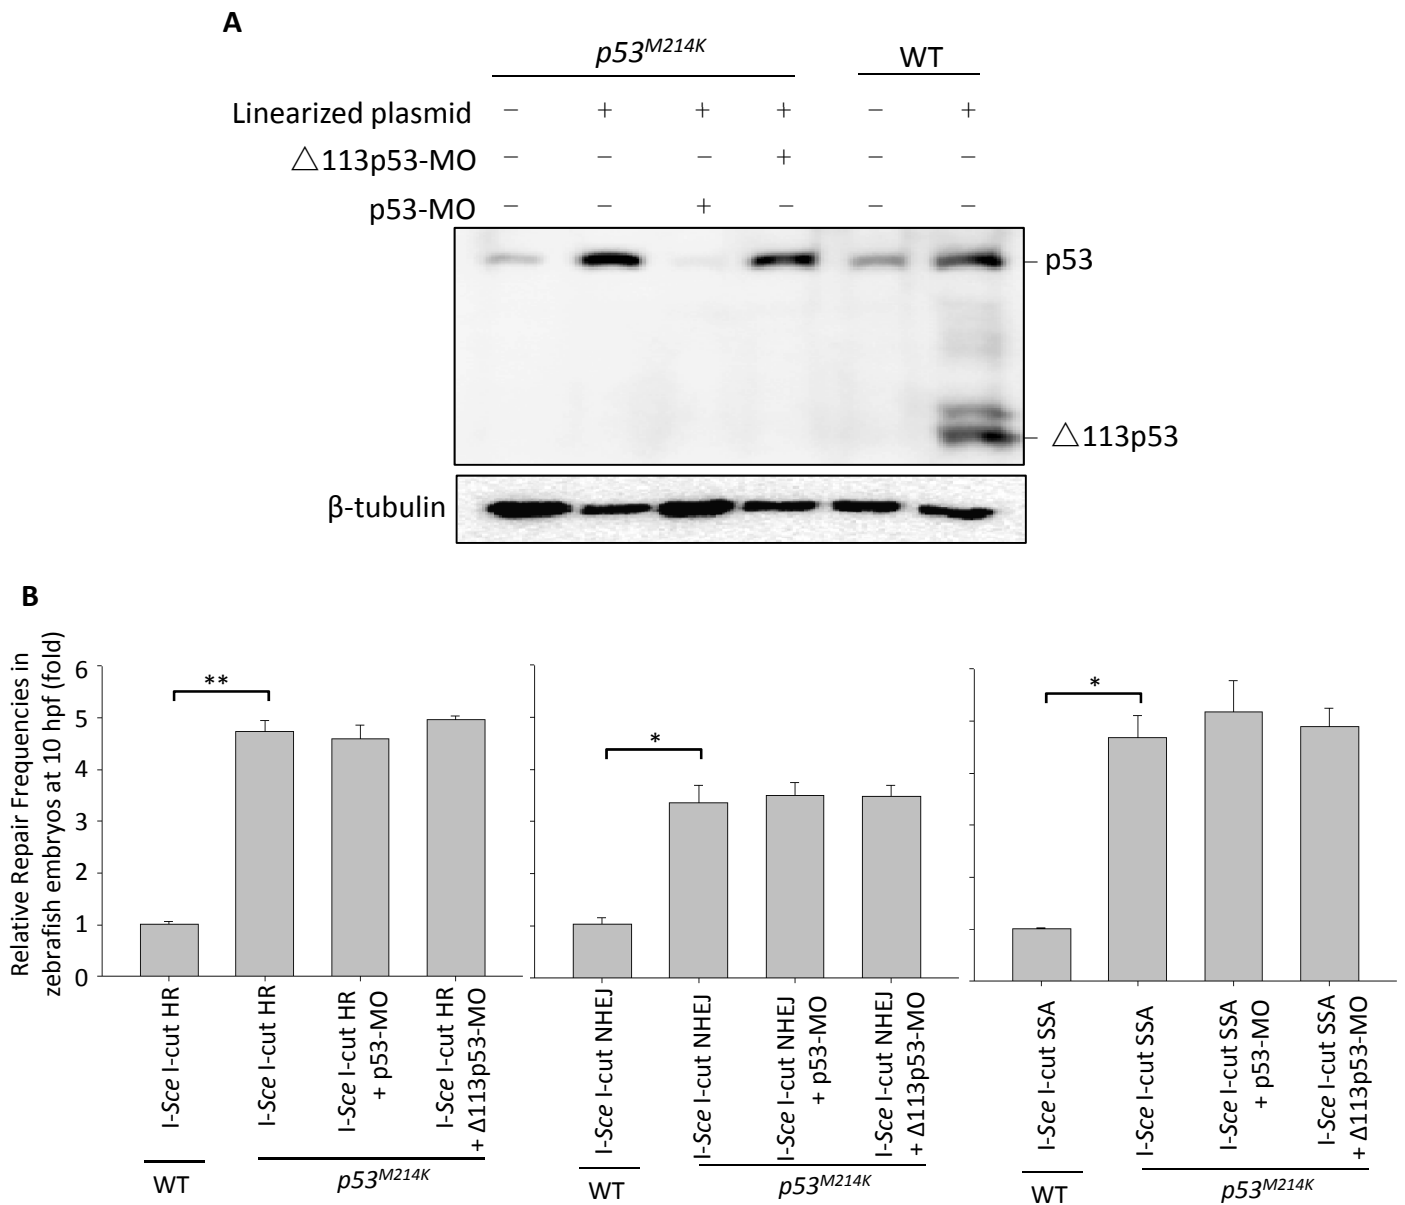

**Supplementary information, Figure S6** The induced  $p53^{M214K}$  mutant protein and basal expression of  $\Delta 113p53p53^{M214K}$  protein do not have a gain-of-function on DNA DSB repairs. (A) Western blot of p53 and  $\Delta 113p53$  proteins in different embryos as indicated. The total protein was extracted at 10 hpf and was subjected to Western blot analysis with the A7-C10 zebrafish p53 monoclonal antibody.  $\beta$ -tubulin was used as the protein loading control. (B) The linearized repair plasmid HR, NHEJ or SSA was co-injected with either p53-MO or  $\Delta 113p53p53$ -MO into  $p53^{M214K}$  mutant embryos. The average repair frequencies were measured using a qPCR analysis of the repaired assay constructs from three repeat experiments at 10 hpf.
