# Supplementary material
Source: PubMed Central journal article supplement (PMC4349251)
Supplement: cr201522x8.pdf [file cr201522x8.pdf]

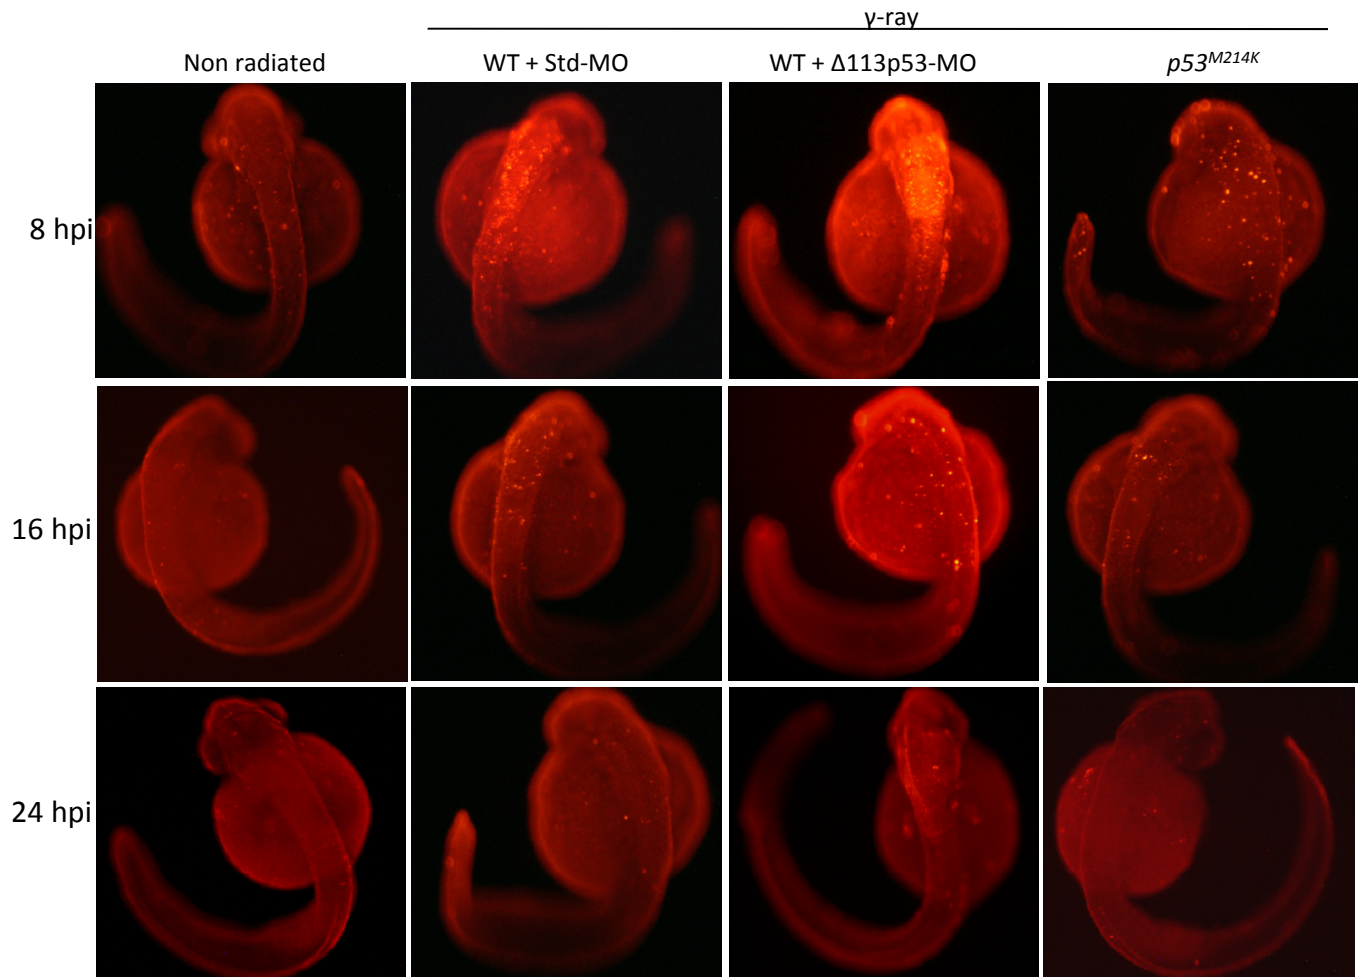

**Supplementary information, Figure S8** A TUNEL assay was used to examine apoptotic cells in  $\Delta$ 113p53-MO or Std-MO injected WT embryos or uninjected  $p53^{M214K}$  mutant embryos, which were either treated with  $\gamma$ -ray irradiation or untreated, at 8, 16 and 24 hour post irradiation (hpi) as indicated. The experiments were carried out as described in Figure 1E. Approximately 30 embryos from each treatment were sampled at each time point.
