# Supplementary material
Source: PubMed Central journal article supplement (PMC4349251)
Supplement: cr201522x10.pdf [file cr201522x10.pdf]

**A** $\Delta 113p53^{M/M}$  (5dpi)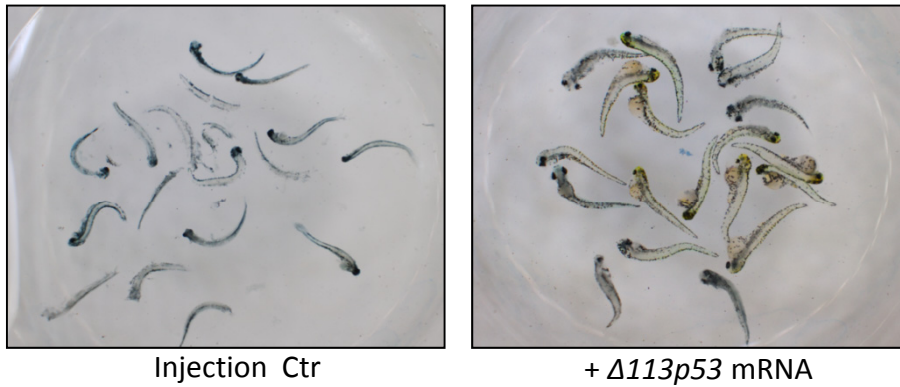**B**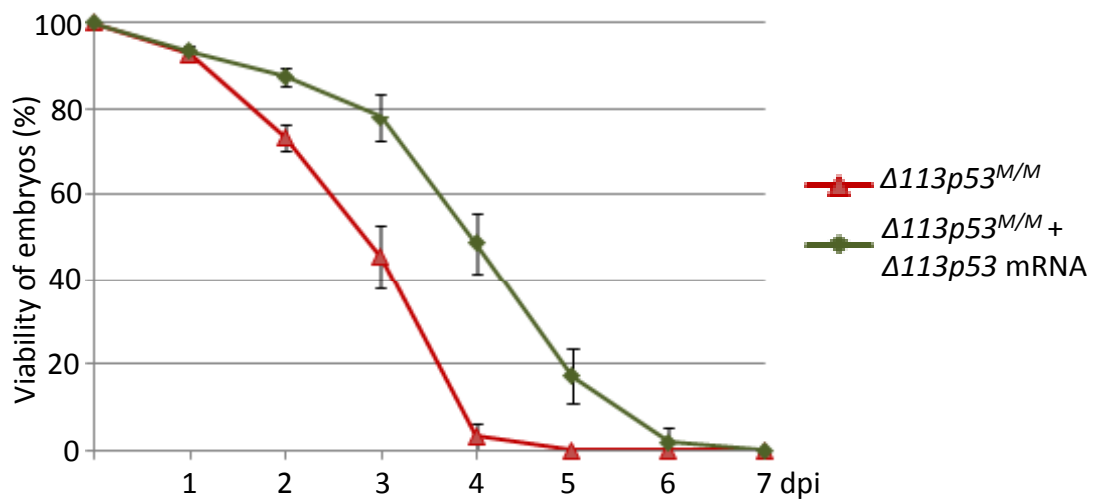

**Supplementary information, Figure S10** (A)  $\Delta 113p53$  mRNA was injected into  $\Delta 113p53^{M/M}$  mutant embryos at the one cell stage. Uninjected and injected embryos with at 1 dpf were treated with  $\gamma$ -irradiation. The pictures were taken at 5 dpi. (B) The average viabilities of embryos in different treatments were taken from three repeats from 1 to 7 dpi as indicated.
