# Supplementary material
Source: PubMed Central journal article supplement (PMC4349251)
Supplement: cr201522x12.pdf [file cr201522x12.pdf]

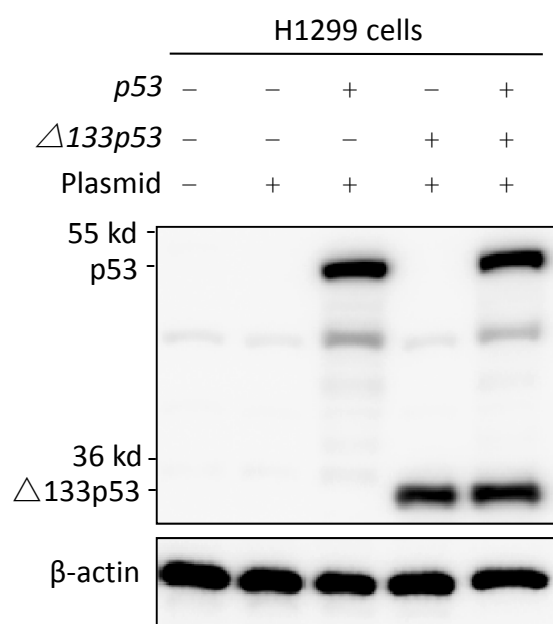

**Supplementary information, Figure S12** Western blot was performed to show the overexpression of p53 and  $\Delta 133p53$  in H1299 cells. Linearized plasmid DNA was co-transfected into H1299 cells with *CMV-p53*, *CMV- $\Delta 133p53$*  or both, as indicated. Protein was extracted at 24 hpt and used in an immunoblot analysis with CM1 p53 antibody.  $\beta$ -actin was used as the loading control.
