# Supplementary material
Source: PubMed Central journal article supplement (PMC4349251)
Supplement: cr201522x13.pdf [file cr201522x13.pdf]

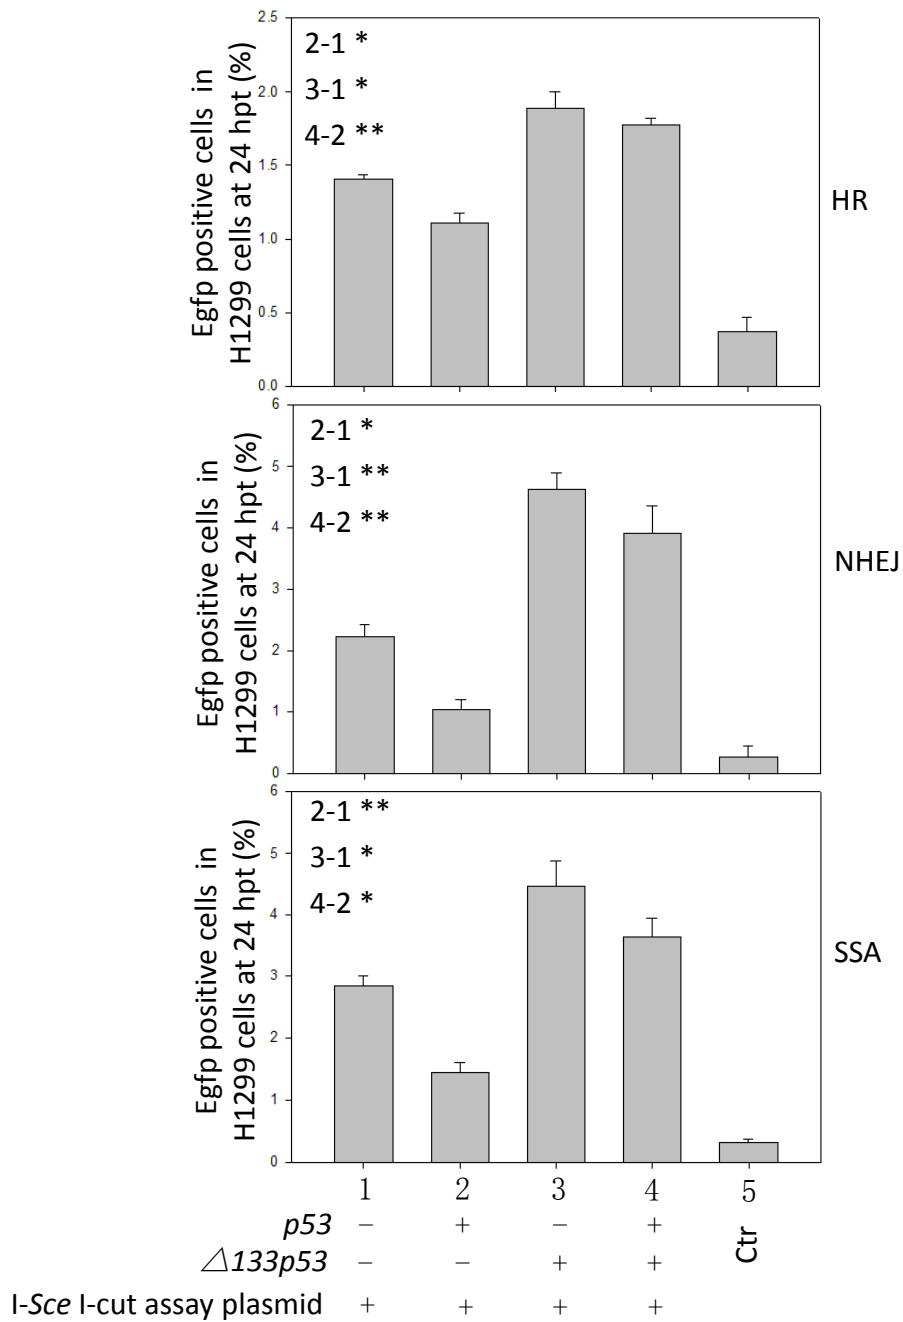

**Supplementary information, Figure S13** DNA DSB repair frequencies for HR, NHEJ and SSA were measured using Egfp positive cells sorted by a FACS machine at 24 hpt. The experiments were performed as described in Figure 2B. Transfection with I-SceI-uncut HR, NHEJ or SSA plasmid was used as the negative control in each assay. The transfected cells were harvested at 24 hpt and subjected to FACS analysis according to green fluorescence density. The average frequency was calculated from three repeat experiments.
