# Supplementary material
Source: PubMed Central journal article supplement (PMC4349251)
Supplement: cr201522x14.pdf [file cr201522x14.pdf]

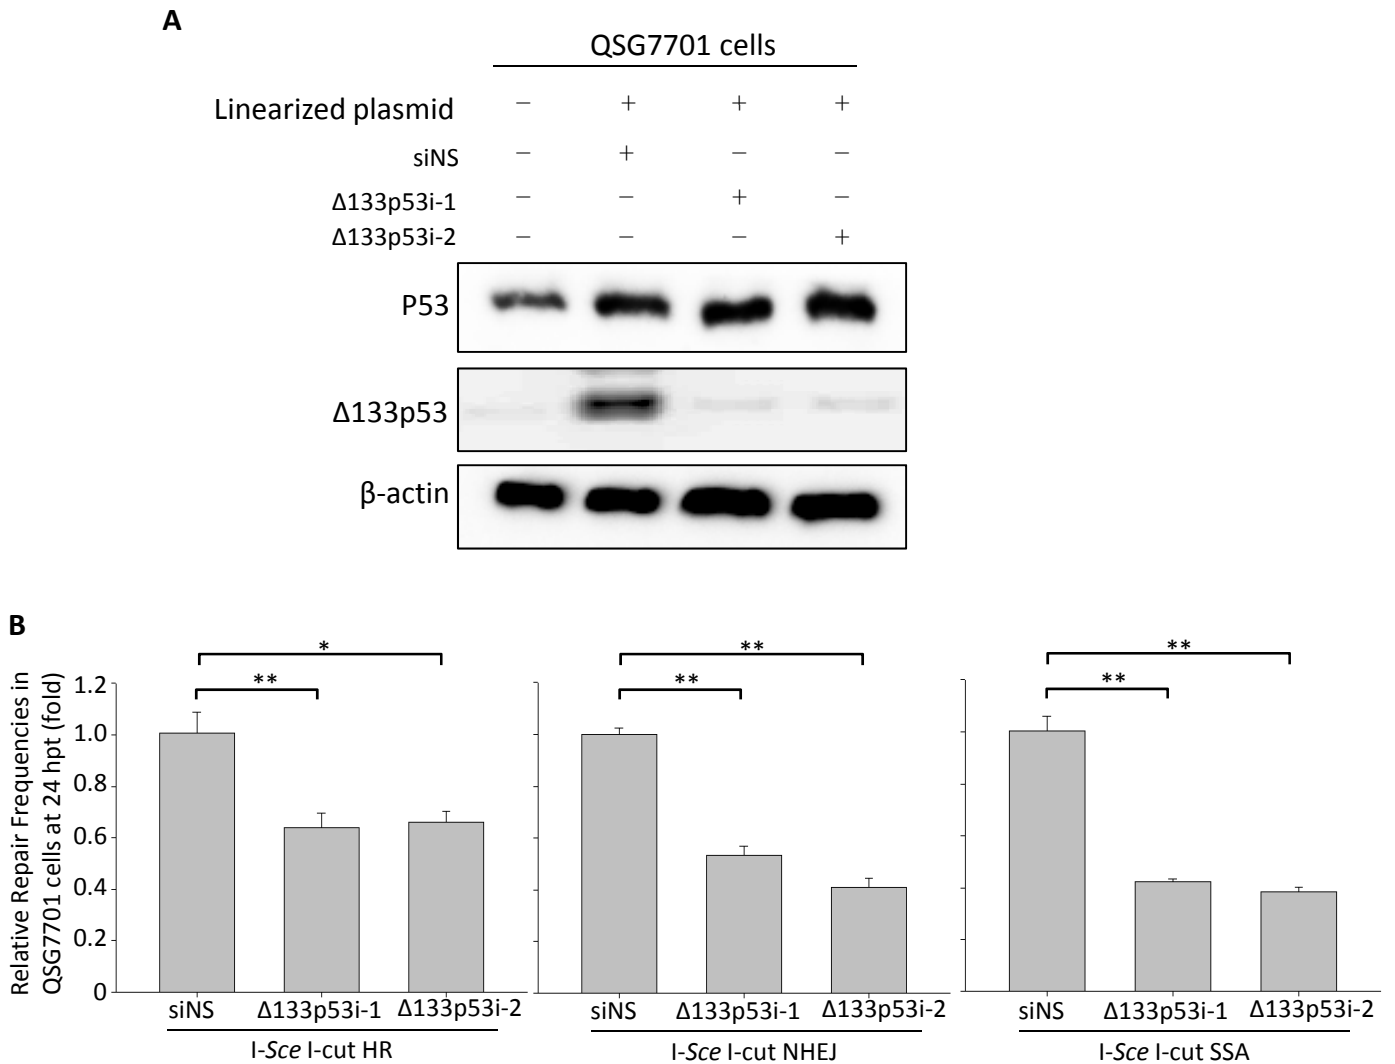

**Supplementary information, Figure S14** The knockdown of  $\Delta 133p53$  significantly decreased the efficiencies of HR, NHEJ and SSA DNA DSB repair pathways. (A) Western blot of human p53 (with DO-1 antibody) and  $\Delta 133p53$  (with CM1 antibody) from the untransfected control and cells or co-transfected the linearized plasmid with either siNS siRNA,  $\Delta 133p53i-1$  or  $\Delta 133p53i-2$  in QSG7701 cells. p53 was activated and  $\Delta 133p53$  was induced by a linearized plasmid transfection. The induced  $\Delta 133p53$  was knockdowned by two  $\Delta 133p53$  siRNAs. (B) Effect of  $\Delta 133p53$  knockdown on HR, NHEJ and SSA repair frequencies. Relative DNA DSB repair frequencies for HR, NHEJ and SSA were measured by qPCR at 24 hpt. The average frequency was calculated from three repeat experiments.
