# Supplementary material
Source: PubMed Central journal article supplement (PMC4349251)
Supplement: cr201522x15.pdf [file cr201522x15.pdf]

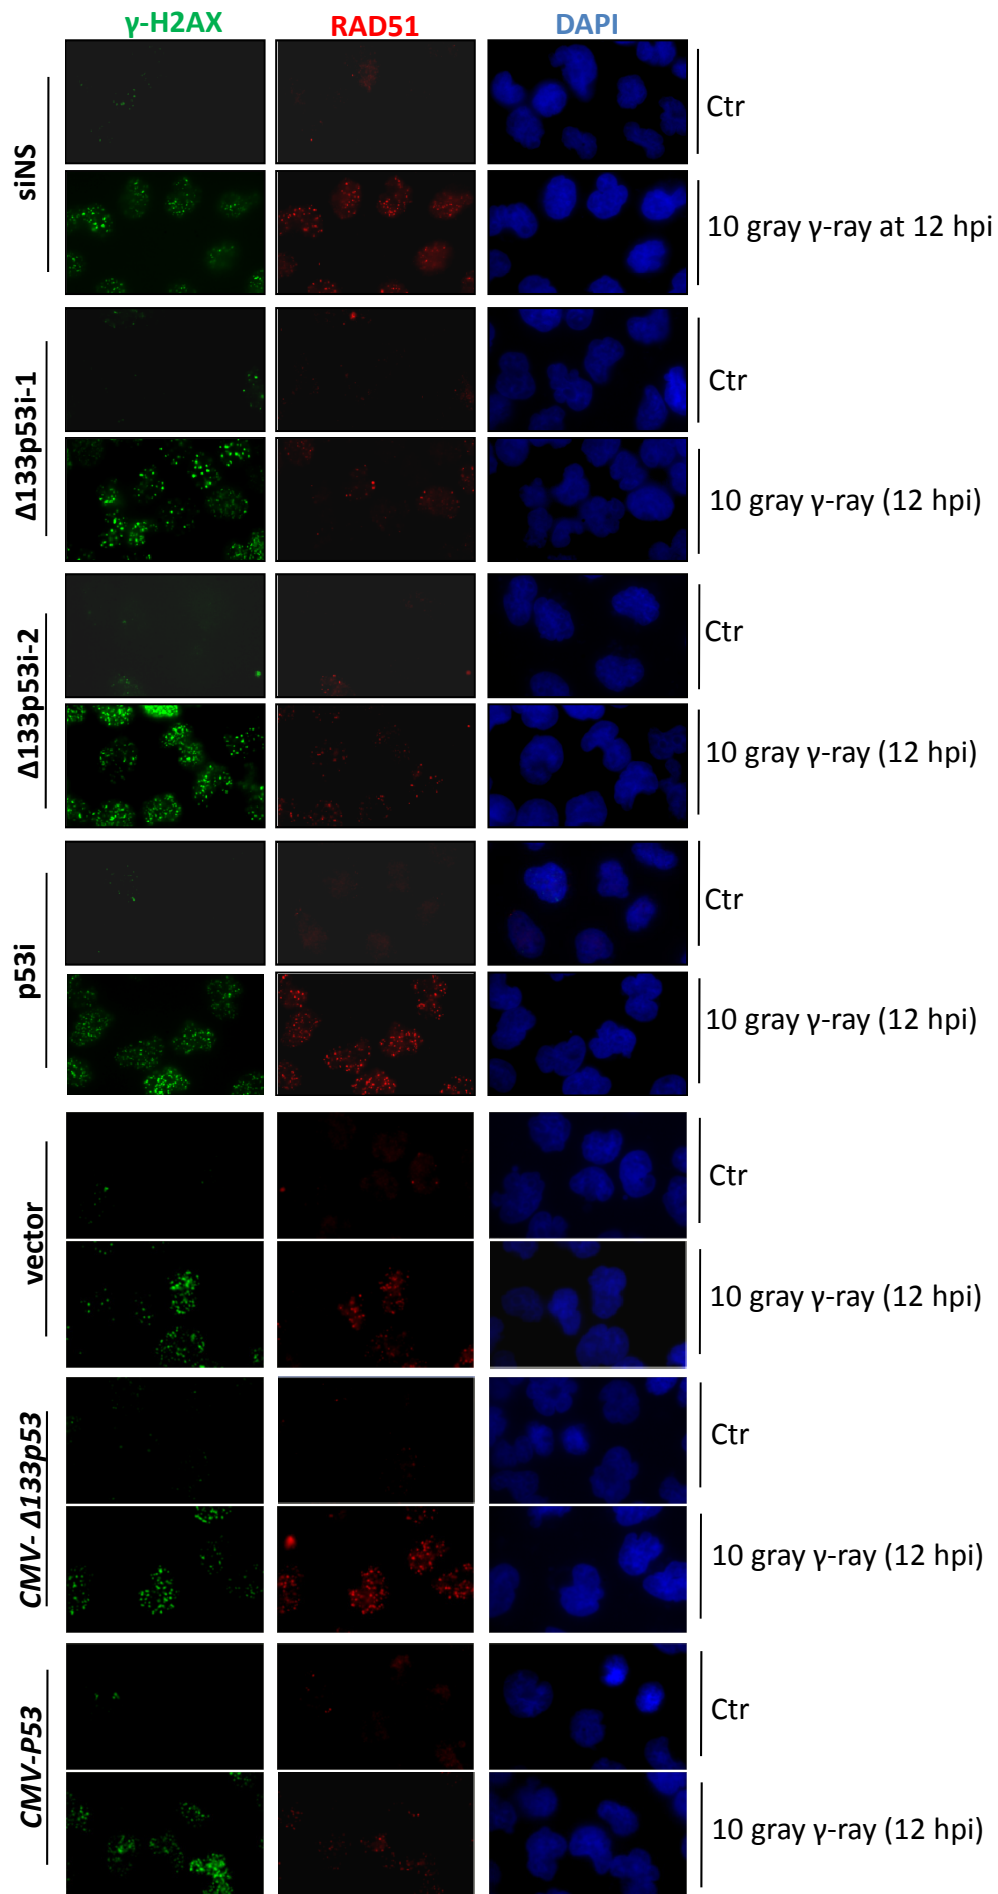

**Figure S15**

**Supplementary information, Figure S15** Fluorescence images of  $\gamma$ H2AX (green), RAD51 (red) and DAPI (blue) staining were taken individually and used to construct the merged picture shown in Figure 4B. DAPI was used to stain the nuclei.
