# Supplementary material
Source: PubMed Central journal article supplement (PMC4349251)
Supplement: cr201522x16.pdf [file cr201522x16.pdf]

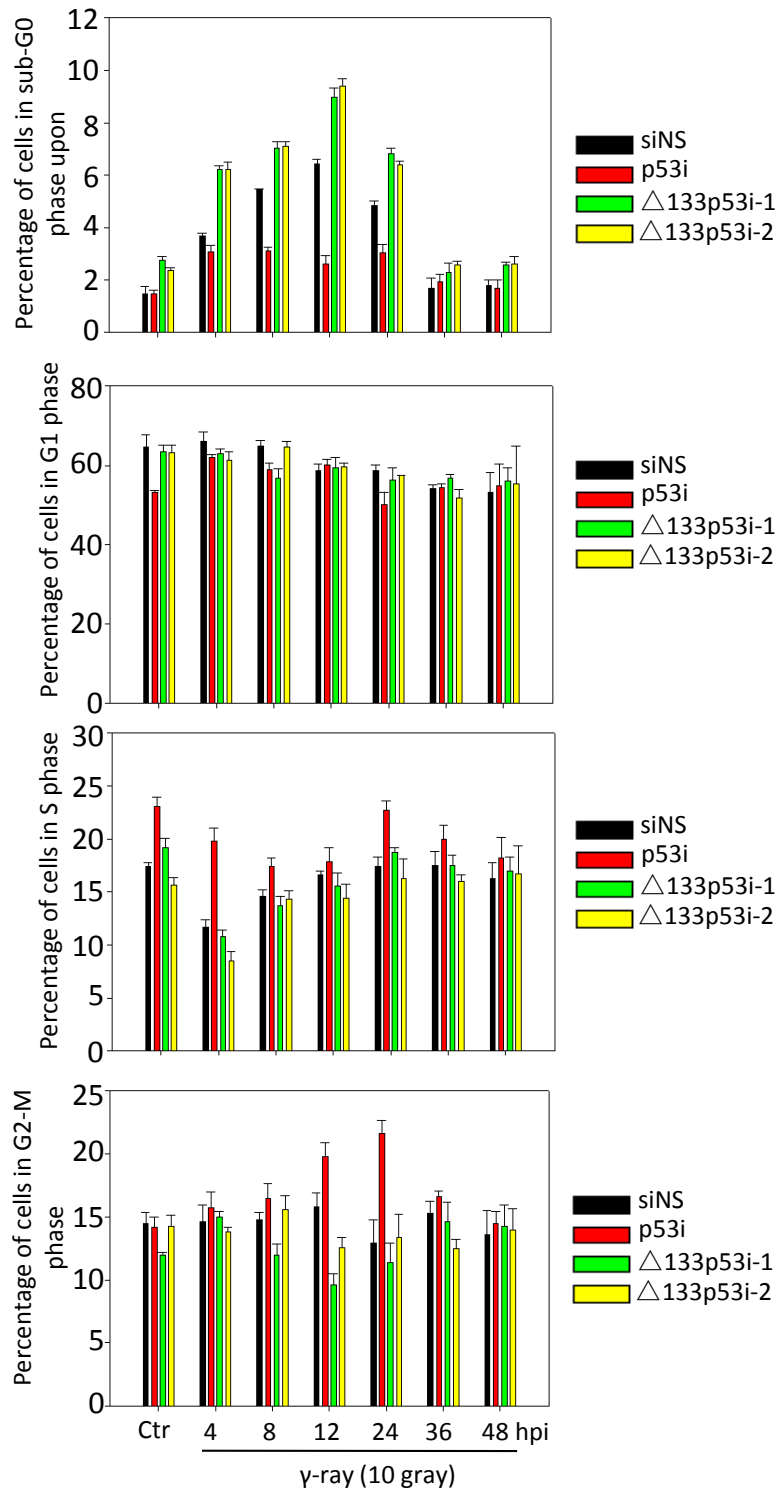

**Supplementary information, Figure S16** FACS analysis of the percentage of cells at different cell cycle phases, based on propidium iodide (PI) staining of QSG-7701 cells transfected with siNS, p53i, Δ133p53i1 or Δ133p53i2 siRNA at different time points after 10 gray of  $\gamma$ -ray irradiation, as indicated. Cells in sub-G0 summit were considered to represent apoptotic cells.
