# Supplementary material
Source: PubMed Central journal article supplement (PMC4349251)
Supplement: cr201522x17.pdf [file cr201522x17.pdf]

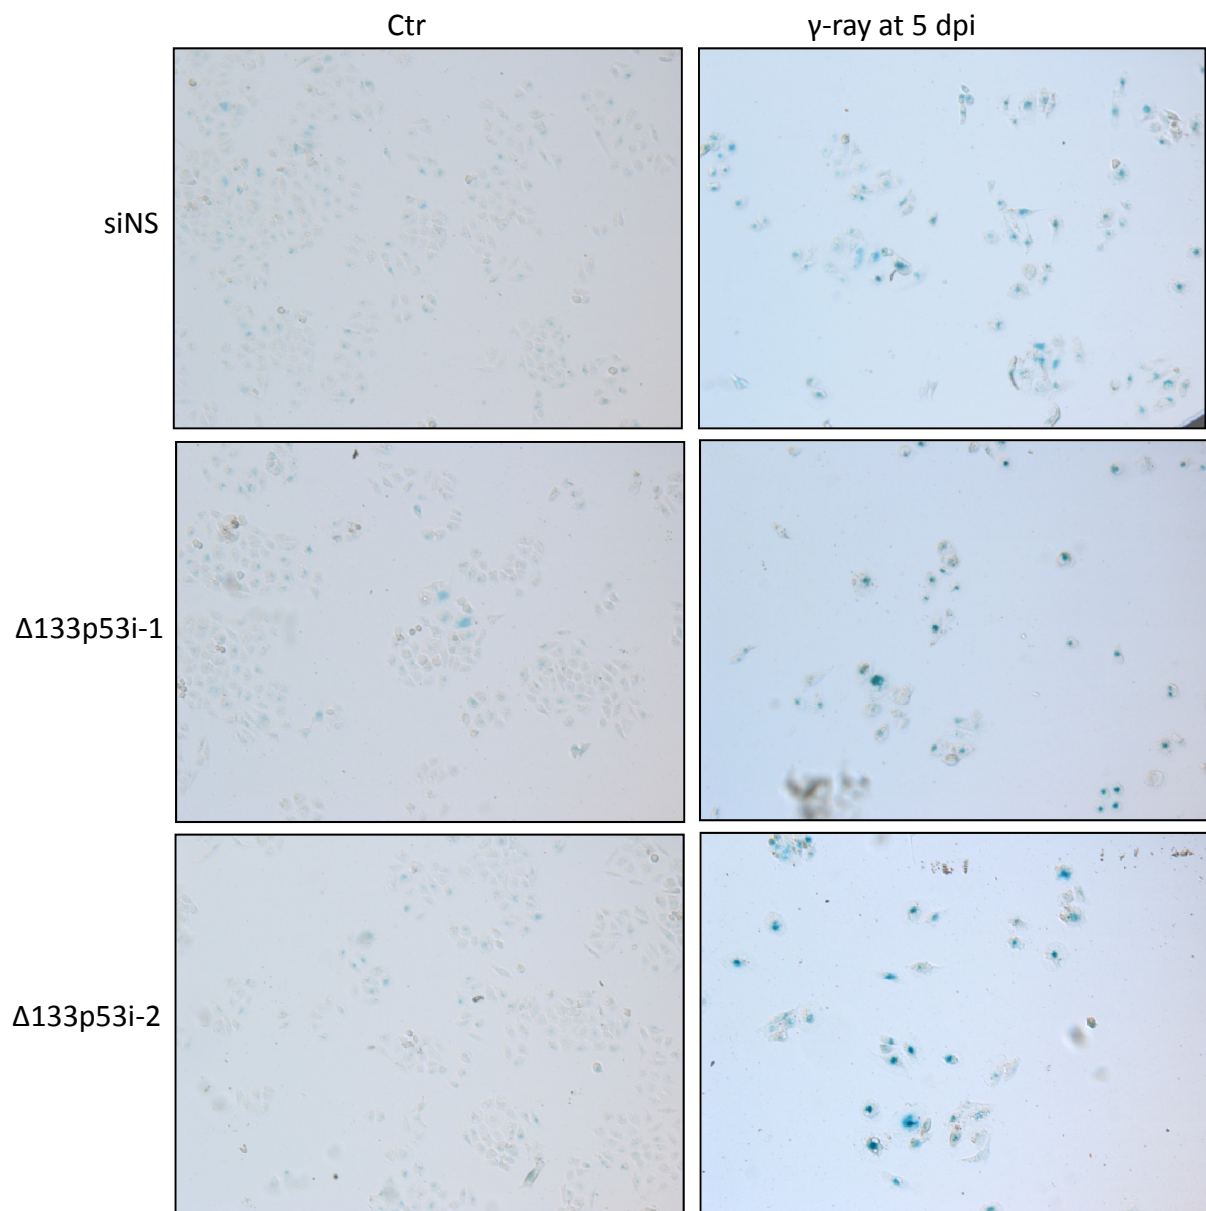

**Supplementary information, Figure S17** Large views for senescence-associated  $\beta$ -galactosidase (SA- $\beta$ -gal) staining in Figure 5C to show that cell colony size was negatively correlated with cell senescence.
