# Supplementary material
Source: PubMed Central journal article supplement (PMC4349251)
Supplement: cr201522x18.pdf [file cr201522x18.pdf]

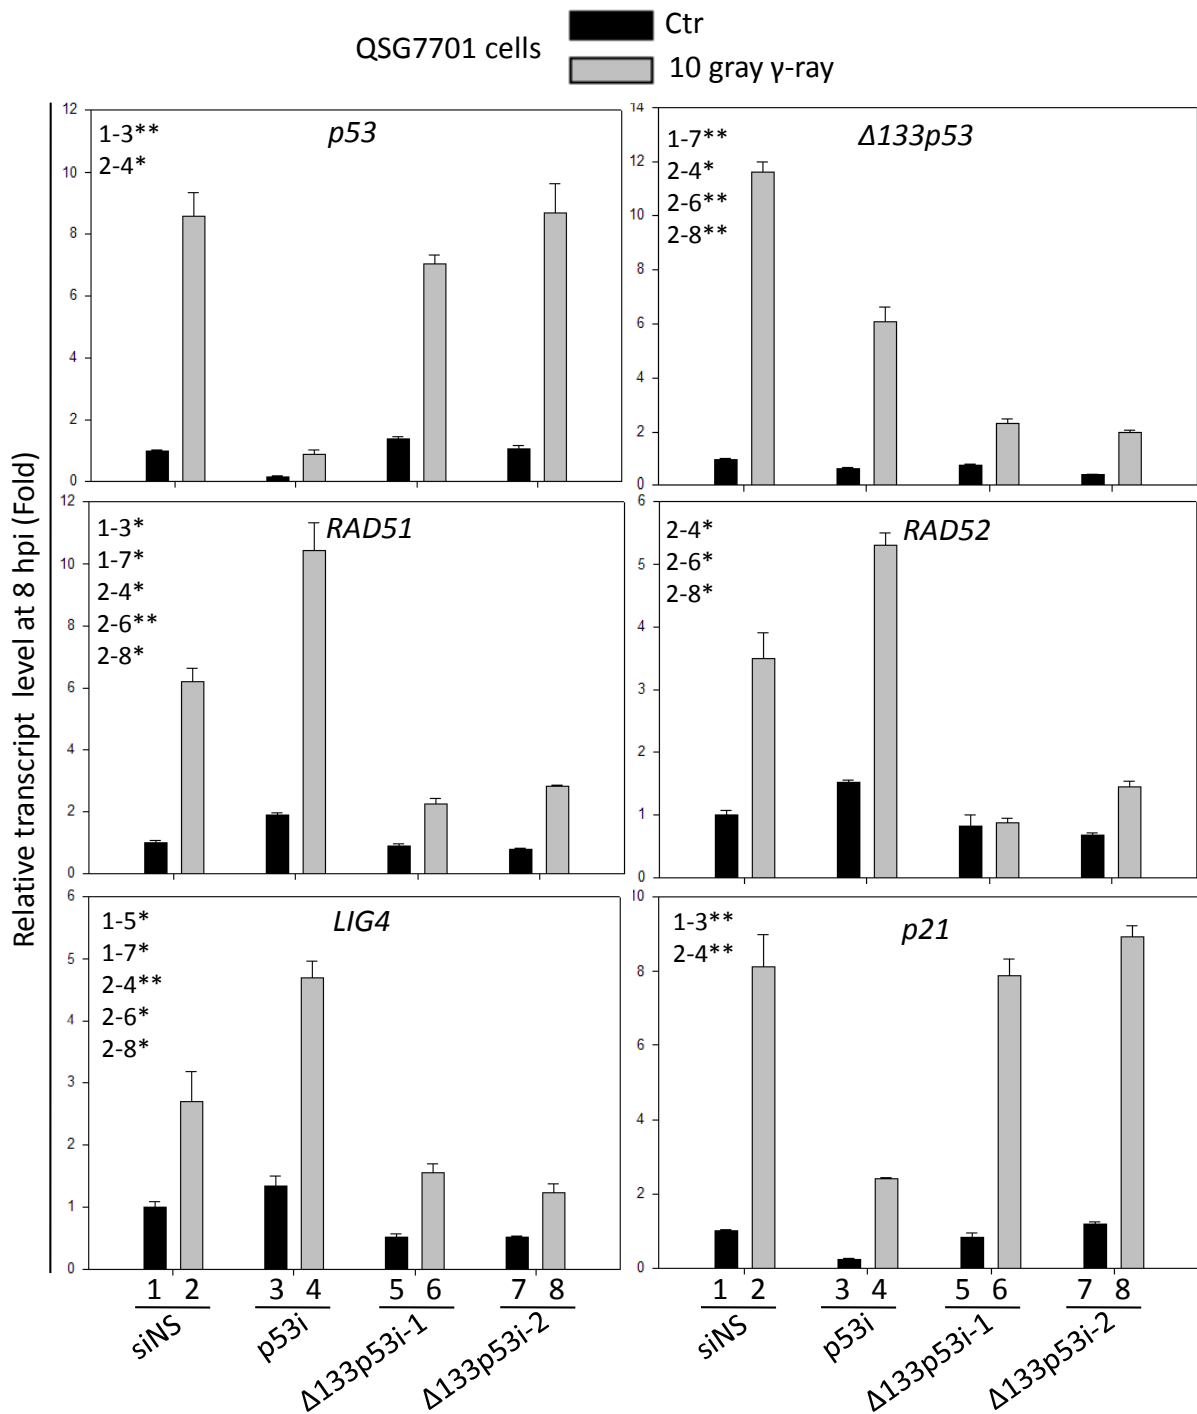

**Supplementary information, Figure S18** Transcriptional expression of the indicated genes in human GSG7701 cells. Cells were transfected for 24 h with p53i,  $\Delta 133p53i-1$ ,  $\Delta 133p53i-2$  or siNS (as indicated), then were left untreated (Ctr) or treated with 10 gray of  $\gamma$ -ray irradiation. Total RNA from each sample was extracted at 8 hpi and subjected to qRT-PCR analysis. The expression levels of the analyzed genes were normalized against  $\beta$ -actin.
