# Supplementary material
Source: PubMed Central journal article supplement (PMC4349251)
Supplement: cr201522x19.pdf [file cr201522x19.pdf]

|                 |                                                                                                                                                         |
|-----------------|---------------------------------------------------------------------------------------------------------------------------------------------------------|
| Human promoter  | <p style="text-align: center;">Activator for p53</p> <p style="text-align: center;"> </p>                                                               |
| <i>RAD51</i>    | Not found                                                                                                                                               |
| <i>RAD52</i>    | Not found                                                                                                                                               |
| <i>LIG4</i>     | Not found                                                                                                                                               |
|                 | <p style="text-align: center;">Repressors for P53</p> <p style="text-align: center;"> </p> <p style="text-align: center;">Or </p>                       |
| <i>RAD51</i>    | -4140 AAACA A AAACA (6) AAACA AAACA -4113                                                                                                               |
| <i>RAD52</i>    | -2388 AGACT G AAGCA (12) GAGCC C AGGCA -2354<br>-2735 TAGCA G GAACT (21) GAGCT GAGCA -2693                                                              |
| <i>LIG4</i>     | -2006 AGTCC AGCTT (13) AGCTC AGTAG -1973                                                                                                                |
|                 | <p style="text-align: center;">New type repressor for P53</p> <p style="text-align: center;"> </p>                                                      |
| <i>RAD51</i>    | -2842 AAGCA AGCAT (9) AGCTC TGCCT -2813                                                                                                                 |
| <i>RAD52</i>    | None                                                                                                                                                    |
| <i>LIGASEIV</i> | -3392 CTGCA AGCCG (18) TGTTT TGCCT -3354                                                                                                                |
|                 | <p style="text-align: center;">Activators for <math>\Delta</math>133p53</p> <p style="text-align: center;"> </p> <p style="text-align: center;">Or </p> |
| <i>RAD51</i>    | -2874 GAACT GGGCT (22) AAGCA AGCAT -2931<br>-3967 GAACA G AAACT (4) AAACT AGTTT -3942                                                                   |
| <i>RAD52</i>    | -2659 AGGCT G AGGCA (27) AGACA AGCCT -2611<br>-2422 GGGCA TGTAG (24) AGACT G AAGCA -2377                                                                |
| <i>LIG4</i>     | -1741 GGGCT AGACG (13) AAACT AGCAC -1708<br>-4094 CCGCA GGGCT (7) GGGCT GGTCC -4067                                                                     |

R=A or G  
W=A or T  
Y=C or T

**Supplementary information, Figure S19** A comparison of *p53* responsive elements in human *RAD51*, *RAD52* and *LIG4* promoters with the known *p53*-repressive or -activating consensus sequences. The black and red arrows correspond to the orientations of the quarter sites. R=A or G, W=A or T, Y=C or T. The mismatch nucleotide is red. The positions of the *p53* responsive elements in the promoters are indicated.
