# Supplementary material
Source: PubMed Central journal article supplement (PMC4349251)
Supplement: cr201522x20.pdf [file cr201522x20.pdf]

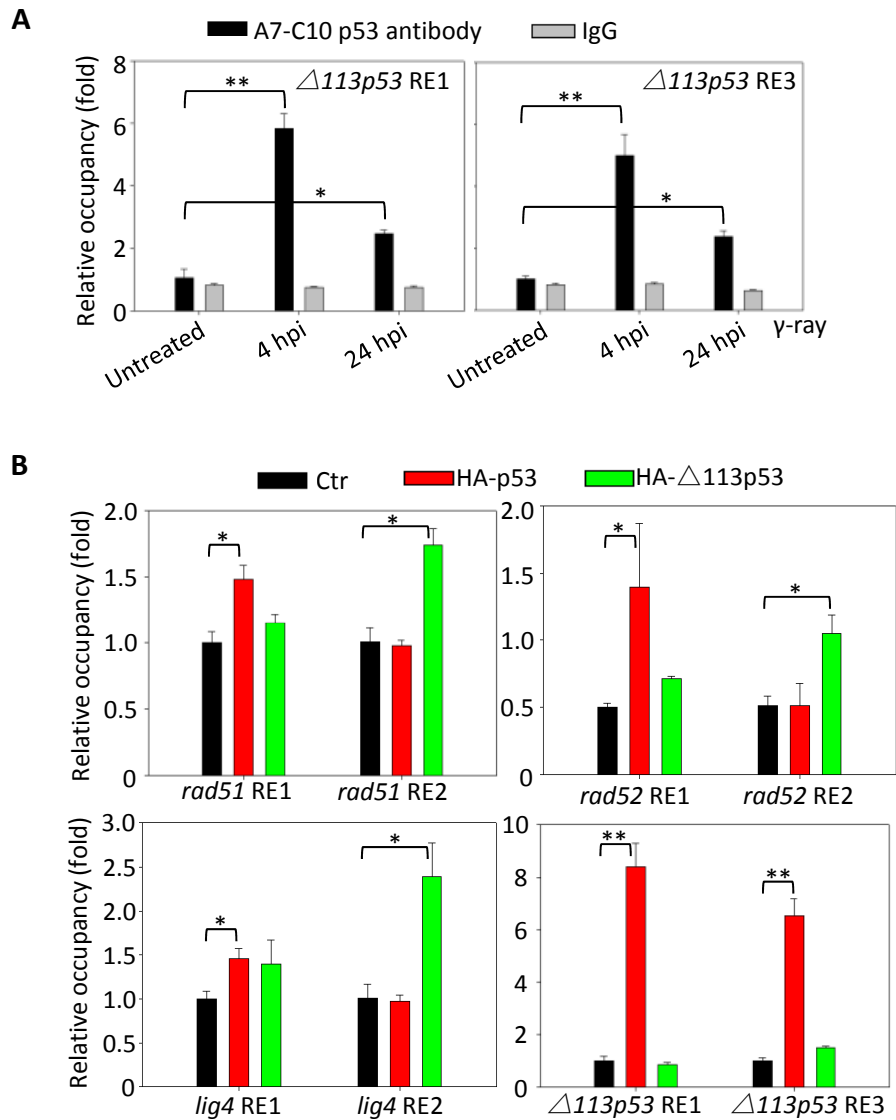

**Supplementary information, Figure S20** ChIP of the *p53* and  $\Delta 113p53$  REs in *rad51*, *rad52* and *lig4* promoters in the absence and presence of HA-*p53* and HA- $\Delta 113p53$ . HA-*p53* or HA- $\Delta 113p53$  mRNA was injected into *p53*<sup>M214K</sup> mutant embryos. An HA-antibody matrix was used to co-immunoprecipitate the protein-DNA complex. Specific primer pairs were designed to amplify the corresponding REs. DNA was normalized with exon-specific primers. *p53* RE1 and RE3 of the  $\Delta 113p53$  promoter were used as a *p53*-binding positive control. The results are presented as the relative occupancies of the different REs. Statistics were obtained from three repeat experiments.
