# Supplementary material
Source: PubMed Central journal article supplement (PMC4349251)
Supplement: cr201522x21.pdf [file cr201522x21.pdf]

**Supplementary information, Table S1:PCR Primers**

| <b>Primers for quantifying the frequencies of HR, SSA and NHEJ</b> |                                                                                  |
|--------------------------------------------------------------------|----------------------------------------------------------------------------------|
| Normalizing forward primer (Norm-F)                                | ATCATGGCCGACAAGCAGAAGAACG                                                        |
| Normalizing reverse primer (Norm-R)                                | CGGCGGCGGTCACGAACTCC                                                             |
| HR and SSA repair forward primer (HR and SSA-Rep-F)                | TGACCACCCTGACCTACG                                                               |
| Repair reverse primer (Rep-R):                                     | CACCTTGATGCCGTTCTTCTGC                                                           |
| NHEJ repair forward primer (NHEJ-Rep-F-1)                          | TCGGAGCAAGCTTGATTAGGTGA                                                          |
| <b>Primers for the overexpression constructs</b>                   |                                                                                  |
| <i>rad51</i> -EcoRI-For                                            | GCCAGAATTCAATATGGCC<br>ATGAGGAACGCATC                                            |
| <i>rad51</i> -XhoI-Rev                                             | CGGTCTCGAGTCAGTCTTTAGCATCTCCCA                                                   |
| <i>rad52</i> -EcoRI-For                                            | GCCAGAATTCAATATGGCC<br>ATGGATTATAGCAGCGGGA                                       |
| <i>rad52</i> -XhoI-Rev                                             | CGGTCTCGAGTCACGTGTCCAATCTTCGTT                                                   |
| <i>lig4</i> -ClaI-For                                              | GCCAATCGATAATATGGCCATGGAAAGTGTC<br>TCAAAAAGT                                     |
| <i>lig4</i> -XhoI-Rev                                              | CGGTCTCGAGTTAAATCAGGTAGTCAATCT                                                   |
| HA-HuRad51-BamH1-For                                               | CGCGGATCCACCATGGAGTACCCATACGACG<br>TACCAGATTACGCTCATGCAATGCAGATGCA<br>GCTTGAAGCA |
| HA-HuRad51-Xba1-Rev                                                | CGCTCTAGATCAGTCTTTGGCATCTCCCAC<br>TCA                                            |
| HA-HuRPA2-For-BamH1                                                | CGCGGATCCACCATGGAGTACCCATACGACG<br>TACCAGATTACGCTCATTGGAACAGTGGATT<br>CGAAAG     |
| HA-HuRPA2-Rev-EcoR1                                                | CGCGAATTCTTATTCTGCATCTGTGGAT                                                     |
| <b>Primers for the <i>rad51</i> promoter analysis</b>              |                                                                                  |
| <i>rad51pro</i> -XhoI-For                                          | CGCCTCGAGTGTGAGAATGTGAGGTATATAA<br>AT                                            |
| <i>rad51pro</i> -BamHI-Rev                                         | CATGGATCCTGCTAGAGCTGAACTTTCCCGC<br>GT                                            |
| <i>rad51p</i> -ΔRE1-For                                            | TTCATCTTACTCCGGTGACTGGGCTAGCCAAT<br>CCTGGAGCACCT                                 |
| <i>rad51p</i> -ΔRE1-Rev                                            | CTAGCCCAGTACCGGAGTAAGATGAAAGA<br>GGAGGCATTGAAGATG                                |
| <i>rad51p</i> -ΔRE2-For                                            | AGCAATCAGGTACGTGACGGGGTGAGAACG<br>CGGCGAAATCCGAA                                 |
| <i>rad51p</i> -ΔRE2-Rev                                            | CTCACCCCGTCACGTACCTGATTGCTGGAGC                                                  |

|                                                   |                           |
|---------------------------------------------------|---------------------------|
|                                                   | TGCTCTTTCCCGGACT          |
| <b>Primers for qRT-PCR in zebrafish</b>           |                           |
| ZF rad51 qPCR For(accession No: BC062849)         | AGCGCAGAGCCGAAATCATCC     |
| ZF rad51 qPCR Rev                                 | TTCAGCCACAGCCAGCAGTCTCT   |
| ZF rad52 qPCR For(accession No: BC098627)         | CAGCGGGAGGCAAGAGGAGAG     |
| ZF rad52 qPCR Rev                                 | TTGGCCAGGCTTATAACTTTGTGA  |
| ZF lig4 qPCR For(accession No: NM_001103123)      | GCTGCGCAAGTTCCGTTTCATT    |
| ZF lig4 qPCR Rev                                  | GCCATTCGCTCCCTCTCAAAG     |
| ZF p21 qPCR For                                   | GAAGCGCAAACAGACCAACAT     |
| ZF p21 qPCR Rev                                   | GCAGCTCAATTACGATAAAGA     |
| ZF Mdm2 qPCR For                                  | CTCGCAGTGAGGGCAGTGAAG     |
| ZF Mdm2 qPCR Rev                                  | TCTAGGCACGTAGCGGGAAGG     |
| ZF-18S rRNA-480F                                  | CGCCACTTGTCCCTCTAAGAA     |
| ZF-18S rRNA-851R                                  | GTAGTTCGACCGTAAACGAT      |
| ZF RecQ4 qPCR For(accession No: CR927913)         | GGAGGCGGCCATCATGAGAATACT  |
| ZF RecQ4 qPCR Rev                                 | GAACGCCAGCCGGTCCCTTAG     |
| ZF WRN qPCR For(accession No: EE302738)           | TTCCAGACCCACGGCGCAACAAAC  |
| ZF WRN qPCR Rev                                   | CTCCTCCGCCAGCTCCGCCTTCA   |
| ZF 53BP1 qPCR For(accession No: AI793650)         | GGGCGACGTTACCAGGGAGAC     |
| ZF 53BP1 qPCR Rev                                 | CTTTTGGGCAATTTGGAGACAGT   |
| ZF BRCA2 qPCR For(accession No: NM_001110394)     | ATGAAGCTGCAGGAGATGGTTTAG  |
| ZF BRCA2 qPCR Rev                                 | TGATGAATGGGCTTTGATGACTCT  |
| ZF Ku70 qPCR For(accession No: NM_199904)         | TTATGGGACTGAGCAGAGCAAGAA  |
| ZF Ku70 qPCR Rev                                  | ATCGCAAAGAACAGGGAAACATC   |
| ZF Ku80 qPCR For (accession No: NM_001017360)     | TGTGCCGTTTTCAAAGGTAGAC    |
| ZF Ku80 qPCR Rev                                  | TGGGGAAAGTGAAGTGAAGTGAAGT |
| ZF MRE11 qPCR For (accession No: NM_001001407)    | GGCAACCATGATGACCCAAGT     |
| ZF MRE11 qPCR Rev                                 | TACGGACCGGAGCGATTTTACACT  |
| ZF DNA-PK qPCR For (accession No: XM_001919553.2) | TTAGACTCTTCATCGCCAAACTTA  |
| ZF DNA-PK qPCR Rev                                | AAACCGCTCGTATATCAAATCGTA  |
| ZF XRCC4 qPCR For (accession No: NM_200786)       | TTCAGGCTGGGCGTGGTGGAT     |
| ZF XRCC4 qPCR Rev                                 | CAGGGCTCGGAGTTTGGCTTTCT   |
| ZF RPA2 qPCR For (accession No: NM_199811)        | GGAGACAAAAGGGGAGGACACG    |
| ZF RPA2 qPCR Rev                                  | AACGCTGAACGCCACCAAAGAC    |
| <b>Primers for qRT-PCR in human cell lines</b>    |                           |

|                                         |                          |
|-----------------------------------------|--------------------------|
| Hu <i>Rad51</i> H1 qPCR 665 For         | ACAGTGCCACCGCCCTTTACA    |
| Hu <i>Rad51</i> H1 qPCR 905 Rev         | GGTTTCCCCTCTTCCTTTCTCA   |
| Hu <i>Rad52</i> qPCR 54 For             | TGGCGGCGGCTCAGTGTTATG    |
| Hu <i>Rad52</i> qPCR 253 Rev            | ATTCTGCTGCGTGATGGAGTGTGC |
| Hu <i>Lig4</i> H1 qPCR 1806 For         | TAGGGGGAAGGCATCTGGTAAG   |
| Hu <i>Lig4</i> H1 qPCR 2069 Rev         | GTGTCTGGGCCTGGATTTTGTA   |
| Hu <i>d133p53</i> qPCR i4 For           | TGGGTTGCAGGAGGTGCTTAC    |
| Hu <i>d133p53</i> qPCR i4 Rev           | CCACTCGGATAAGATGCTGAGG   |
| Hu Full <i>p53</i> qPCR For             | TGGAGGAGCCGCAGTCAGAT     |
| Hu Full <i>p53</i> qPCR Rev             | GCAGGGGCCCGCGGTGTAGGAG   |
| Hu $\beta$ - <i>Actin</i> qPCR For      | TGGTGGGCATGGGTCAGAAGGAT  |
| Hu $\beta$ - <i>Actin</i> qPCR Rev      | CCAGAGGCGTACAGGGATAGCAC  |
| <b>Primers for qPCR in a ChIP assay</b> |                          |
| ChIP- $\Delta 113p53$ -RE1-For          | GACTTCAGAGATGGTTGTTG     |
| ChIP- $\Delta 113p53$ -RE1-Rev          | GTTTGGTTGTGGGTGGTA       |
| ChIP- <i>p53</i> -RE3-For               | GCAGAATCAGTGGAGGTT       |
| ChIP- <i>p53</i> -RE3-Rev               | CAAATGTTCCGAGGAT         |
| ChIP- <i>p53</i> -exon10-For            | TGTGATCCATTAGTCCTGTT     |
| ChIP- <i>p53</i> -exon10-Rev            | ACAACCGAATACTGGCATT      |
| <i>rad51</i> -ChIP-RE1-For(-3418)       | GTTTCATCTTCAATGCCTCCTCT  |
| <i>rad51</i> -ChIP-RE1-Rev(-3579)       | CTCATACTTCAGCTCCACATC    |
| <i>rad51</i> -ChIP-RE2-For(-1241)       | AGGCTCAAGATGCGGAGAG      |
| <i>rad51</i> -ChIP-RE2-Rev(-1118)       | CCGTCACGAACTTGTTCACT     |
| <i>rad51</i> -ChIP-exon-For(6911)       | TTCCACCACAGTCCACAGA      |
| <i>rad51</i> -ChIP-exon-Rev(7009)       | CCAATGCTGAACCTCCAATCT    |
| <i>rad52</i> -ChIP-RE2-For(-4986)       | AGCTACACTGTGTTCTGAG      |
| <i>rad52</i> -ChIP-RE2-Rev(-4807)       | AGGAACCATTAGTTCACCAT     |
| <i>rad52</i> -ChIP-RE1-For(-2659)       | TCAAGGACATTCGCCGAGAT     |
| <i>rad52</i> -ChIP-RE1-Rev(-2419)       | ATGGTGGTGGCAGCATCAT      |
| <i>rad52</i> -ChIP-exon-For(3375)       | TTATGTGCTGCTGCCAAT       |
| <i>rad52</i> -ChIP-exon-Rev(3562)       | TCCATCTCCTGTCTGAACT      |
| <i>lig4</i> -ChIP-RE2-For(-4040)        | ACCAACCAAGATGAGTAAGC     |
| <i>lig4</i> -ChIP-RE2-Rev(-3857)        | ATATCAGGACTCCACCACAT     |
| <i>lig4</i> -ChIP-RE1-For(-2062)        | GAAACATAGTTCAACAGTAGGC   |
| <i>lig4</i> -ChIP-RE1-Rev(-1962)        | CCTACTTTCCTTGTTATACAGC   |
| <i>lig4</i> -ChIP-exon-For(937)         | AAGTGCCATTCCATAAGGT      |
| <i>lig4</i> -ChIP-exon-Rev(1080)        | GTCTGCTGAACTGATAACAA     |
