# Supplementary material
Source: PubMed Central journal article supplement (PMC4349251)
Supplement: cr201522x22.pdf [file cr201522x22.pdf]

**Supplementary information, Table S2:Antibody Information**

|                                                |                                              |
|------------------------------------------------|----------------------------------------------|
| anti-HA mouse monoclonal                       | Sigma (H-3663)                               |
| anti-human RAD51 rabbit monoclonal             | Epitomics(#5181-1) for Western blot          |
| anti-human RAD52 rabbit monoclonal             | Epitomics(#5257-1)                           |
| anti-human $\beta$ -ACTIN rabbit monoclonal    | Epitomics(#1854-1)                           |
| anti-human p53 CM1 rabbit polyclonal           | Novocastra(NCL-p53-CM1)                      |
| anti-human p53 DO-1 mouse monoclonal           | Santa Cruz (DO-1)                            |
| anti-Egfp mouse monoclonal                     | Santa Cruz(#SC-9996)                         |
| anti-human p21 mouse monoclonal                | Santa Cruz(sc-6246)                          |
| anti-human LIG4 mouse monoclonal               | Calbiochem(DR1085)                           |
| anti-human $\gamma$ H2AX S139 mouse monoclonal | Millipore (#05-636)                          |
| anti-human RAD51 polyclonal                    | Cell Application(ct-1201) for immunostaining |
